# Supplementary material for: A study of the enantiospecific degradation of ibuprofen in model aqueous samples using LLME-HPLC-DAD
Source: Royal Society of Chemistry journal article supplement (doi:10.1039/c6ay02670b), 2016-01-01

**A study of the enantiospecific degradation of ibuprofen  
in model aqueous samples using LLME-HPLC-DAD**

*Sylvia Magiera<sup>a,\*</sup>, Aleksandra Piwowarczyk<sup>a</sup>, Anna Węgrzyn<sup>b</sup>*

<sup>a</sup> Department of Inorganic, Analytical Chemistry and Electrochemistry, Silesian University of Technology,  
7 M. Strzody Str., 44-100 Gliwice, Poland

<sup>b</sup> Environmental Biotechnology Department, Silesian University of Technology,  
Akademicka 2 Str., 44-100 Gliwice, Poland

**ELECTRONIC SUPPLEMENTARY INFORMATION**

**Summary**

*This supporting information file includes additional results and information as described in the text of the main article including:*

**Figure S1.** Optical density (OD<sub>600</sub>) in cultures with and without ibuprofen supplementation.

**Figure S2.** Content of ibuprofen enantiomers in cultures containing phenol as an additional source carbon and energy.

**Figure S3.** The phenol removal profile in cultures without ibuprofen supplementation.

Figure S1. Optical density (OD600) in cultures with and without ibuprofen supplementation.

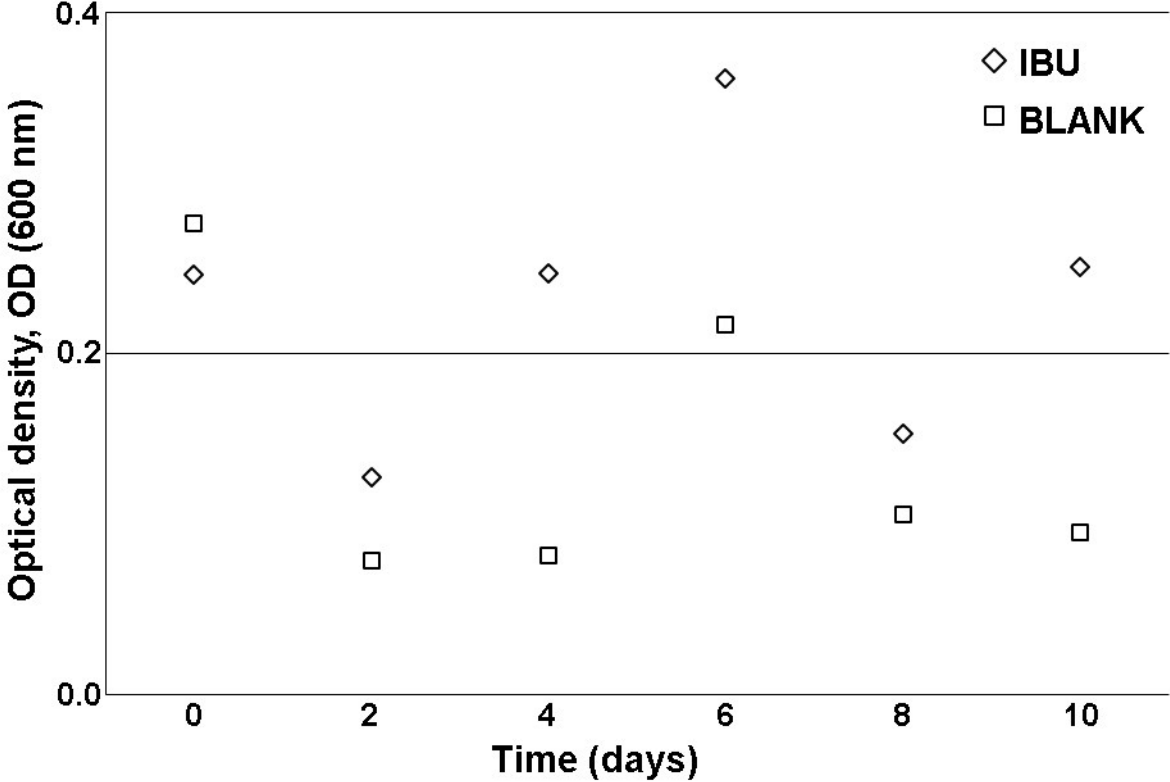

**Figure S2.** Content of ibuprofen enantiomers in cultures containing phenol as an additional source carbon and energy.

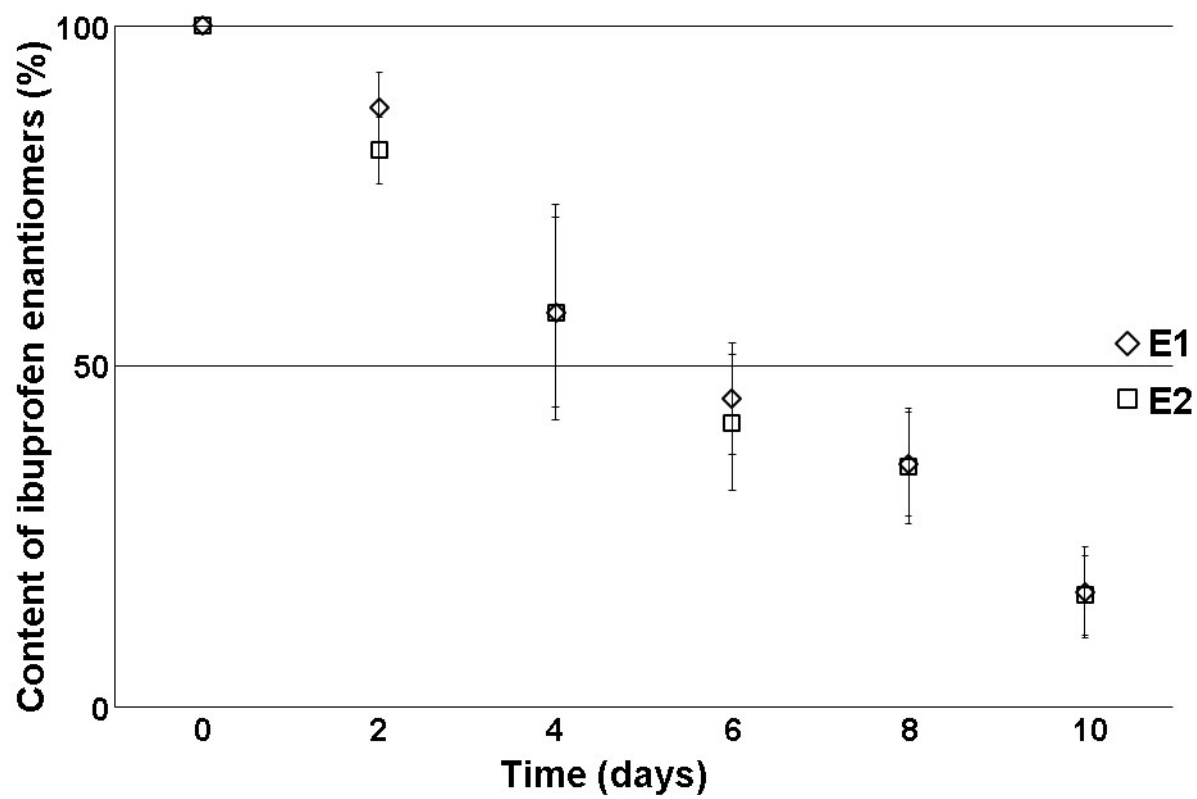

Figure S3. The phenol removal profile in cultures without ibuprofen supplementation.

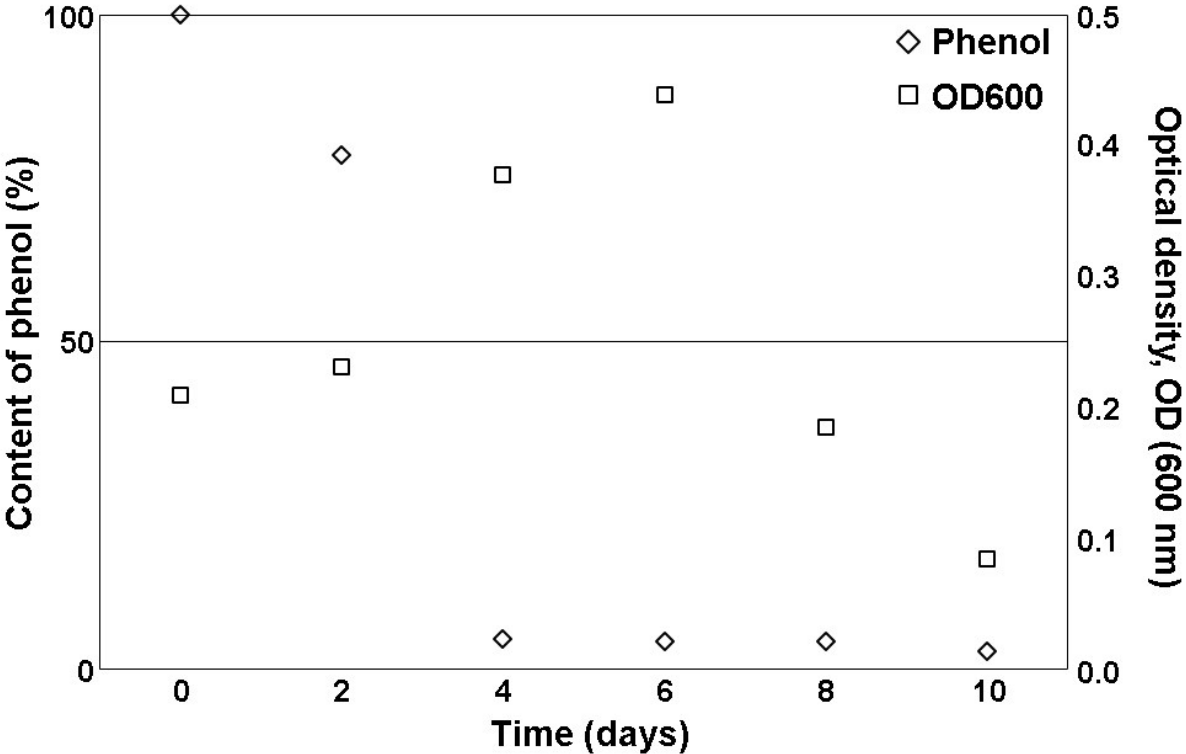

Supplement: c6ay02670b1.pdf [file c6ay02670b1.pdf]
